# Supplementary material for: The Importance of Neutrophils in Osteoarthritis: Current Concepts and Therapeutic Perspectives
Source: MDPI journal article supplement (doi:10.3390/immuno3030017), 2023-07-05
Supplement: s1 [file s1]

**Table S1.** Neutrophil-derived Products and their role in osteoarthritis.

| Products                      | Function in OA Pathology                                                   | References |
|-------------------------------|----------------------------------------------------------------------------|------------|
| Elastase                      | ECM Degradation, Tissue destruction, pro-MMP-13 activator                  | [38]       |
| CXCL8 (IL-8)                  | Neutrophil chemoattractant                                                 | [31]       |
| CCL2 (MCP-1) and CCL4 (MIP-1) | Positively associated with joint pain                                      | [30]       |
| CCL19 and CCR7                | VEGF secretion and further neoangiogenesis                                 | [195]      |
| TNF- $\alpha$                 | Increasing ROS; Inhibits chondrogenic progenitor cells (CPCs) migration    | [32,33,35] |
| IL-1 $\beta$                  | Neutrophil chemoattractant; Enhancement of MMP expression                  | [30]       |
| IL-22                         | Enhancement FLS proliferation; Up-regulation MMP1 and S100A8/A9 production | [39]       |
| IL-17                         | Raising local Fc $\gamma$ R-carrying neutrophils                           | [41]       |
| IFN- $\gamma$                 | Up-regulation of Fc $\gamma$ R in macrophages and neutrophils              | [41]       |

**Table S2.** The potential pharmacological function.

| Treatment                                                    | Function                                                                                                                                                                                                                                                                                                                                                                                                                                                         | References |
|--------------------------------------------------------------|------------------------------------------------------------------------------------------------------------------------------------------------------------------------------------------------------------------------------------------------------------------------------------------------------------------------------------------------------------------------------------------------------------------------------------------------------------------|------------|
| NSAIDs                                                       | Inhibiting neutrophil aggregation and degranulation independent of COX and PGE2 release<br>Reducing C5a- and CXCL8-induced neutrophil migration<br>Reducing F-actin polymerization                                                                                                                                                                                                                                                                               | [99]       |
| Glucocorticoids                                              | Dual function as Inhibitor or inducer of apoptosis in neutrophils<br>anti-inflammatory or pro-inflammatory effects on neutrophils<br>Changing neutrophils' maturation, extravasation, adhesion, metabolism, and activation                                                                                                                                                                                                                                       | [101]      |
| Hyaluronic acid                                              | Decreasing the p-AKT expression level in synovial-fluid neutrophils<br>Decreasing the levels of phosphorylated p38MAPK, NF- $\kappa$ B, p53, Bax, and Caspase-3 in syno-vial fluid neutrophils                                                                                                                                                                                                                                                                   | [102,105]  |
| TNF- $\alpha$ blockers                                       | Attenuating the generation of pro-inflammatory cytokines, chemokines, and MPO by neutrophils<br>Upregulating of adhesion molecules expression<br>Priming of respiratory burst in adherent neutrophils<br>Reducing neutrophil ROS production [112]<br>Reducing the influx of neutrophils from inflamed joints<br>Inhibiting CD69 expression on arthritic neutrophils<br>Downregulating neutrophil chemoattractant IL-8.<br>modulating miRNA levels in neutrophils | [109]      |
| IL-1Ra (e.g. Chondrogenic progenitor cells and Anakinra)     | reducing neutrophil recruitment and degranulation                                                                                                                                                                                                                                                                                                                                                                                                                | [5,126]    |
| Monoclonal anti-IL-1 $\beta$ antibody (e.g. Canakinumab)     | Inhibiting NET formation in neutrophils<br>Downregulating of MAPK14 and NF- $\kappa$ B<br>Upregulating GRP78                                                                                                                                                                                                                                                                                                                                                     | [127,129]  |
| Recombinant IL-37                                            | Reducing CXCL1, MIP1 $\alpha$ /CCL3, IL-1 $\alpha$ , TNF- $\alpha$ , IL-1 $\beta$ , IL-6, and the neutrophil enzyme MPO                                                                                                                                                                                                                                                                                                                                          | [125]      |
| Anti-IL-6 receptors                                          | modulating miRNA levels in neutrophils                                                                                                                                                                                                                                                                                                                                                                                                                           | [130,138]  |
| NE inhibitors (e.g. Sivelestat sodium hydrate and Polydatin) | Inhibiting TNF- $\alpha$ , IL-6, and NO secretion                                                                                                                                                                                                                                                                                                                                                                                                                | [142,143]  |
|                                                              | Inhibiting PAR2, p44/42 MAPK activity                                                                                                                                                                                                                                                                                                                                                                                                                            |            |

|                                       |                                                                                                                     |           |
|---------------------------------------|---------------------------------------------------------------------------------------------------------------------|-----------|
| APPA (apocynin and paeonol)           | Inhibiting NF- $\kappa$ B and HMGB1                                                                                 | [155]     |
|                                       | Reducing neutrophil degranulation and NET formation                                                                 |           |
| G-CSF receptor blockers               | Dysregulating TNF- $\alpha$ and IL-8 expression and ROS generation by neutrophils                                   | [63]      |
|                                       | Inhibiting cytokine-driven signaling pathways (i.e., NF- $\kappa$ B and Erk1/2 pathways)                            |           |
|                                       | suppressing chemokines (KC, MCP-1) and pro-inflammatory cytokines (IL-1 $\beta$ , IL-6) production                  |           |
| MSCs <sup>1</sup>                     | Decreasing CXCR2 and increasing CD62L expression                                                                    | [163,167] |
|                                       | suppressing NO secretion in neutrophil                                                                              |           |
|                                       | Decreasing fMLP in neutrophil                                                                                       |           |
|                                       | inducing respiratory burst in neutrophil                                                                            |           |
|                                       | Reducing the adhesion, infiltration, and recruitment of neutrophils through TNF-stimulated gene 6, CXCL2, and CXCR2 |           |
| Neutrophil-NPs <sup>2</sup>           | polarizing the pro-inflammatory N1 subset into the immune modulatory N2                                             | [174,176] |
|                                       | Altering the expression of IL-6, PDGF, angiopoietin-1, HGF, and VEGF                                                |           |
|                                       | Neutralizing inflammatory cytokines                                                                                 |           |
|                                       | Inhibiting apoptosis of inflamed chondrocytes                                                                       |           |
| Neutrophil-derived exosomes           | Inhibiting pro-inflammatory factors production                                                                      | [191]     |
| NDMV <sup>3</sup> s enriched in AnxA1 | Inducing Th17/Treg cell balance regulation                                                                          | [94,193]  |
|                                       | Downregulating TNF $\alpha$ -induced expression of IL-5, IL-6, IL-8, MCP-1, IFN $\gamma$ , and MIP-1 $\beta$        |           |
|                                       | polarizing MQs towards a more anti-inflammatory M2 phenotype                                                        |           |

<sup>1</sup> Mesenchymal stem cells; <sup>2</sup> Neutrophil nanoparticles; <sup>3</sup> Neutrophil-derived microvesicles.
